# Supplementary material for: Ginseng-derived exosome-like nanovesicles extracted by sucrose gradient ultracentrifugation to inhibit osteoclast differentiation
Source: Royal Society of Chemistry journal article supplement (doi:10.1039/d2nr07018a), 2023-01-01
Supplement: d2nr07018a2.xlsx [file d2nr07018a2.xlsx]

## Sheet: Fig.2A
<Cell proliferation>
	control			3μg/ml			5μg/ml			7μg/ml			10μg/ml			30μg/ml			50μg/ml			100μg/ml
1D	95.7067	102.75	101.544	117.463	118.09	125.519	107.67	116.064	125.904	100.627	112.542	121.563	104.583	96.575	103.425	76.0733	75.4945	77.8582	76.8934	70.8635	77.6652	75.4945	74.0955	76.2663
3D	159.19	218.524	187.265	434.153	621.804	569.561	524.409	643.464	617.077	445.972	584.467	603.956	300.096	366.281	442.595	74.2402	70.7188	73.8061	73.5649	73.7096	73.9508	71.78	73.1307	73.7578
7D	729.474	666.763	594.211	878.871	873.661	876.218	853.111	1007.57	945.007	926.869	917.848	1026.68	1076.32	1138.49	1007.82	79.3536	71.5388	75.1568	69.6093	69.754	71.5388	71.2494	68.9822	71.0082

## Sheet: Fig.3B
<TRAP staining>
	Control			100ng/mL			500ng/mL			1μg/mL
TRAP+ MNC Numbers	95	92	98	43	42	49	30	40	34	20	15	18

## Sheet: Fig.4A
<Gene expresssion>
TRAP	Control			100ng/mL			500ng/mL			1μg/mL
	1.05946	0.981686	0.961483	0.436282	0.385108	0.359318	0.298679	0.221698	0.171546	0.128812	0.117712	0.168794
OSCAR	Control			100ng/mL			500ng/mL			1μg/mL
	1.07923	1.00696	0.920188	0.621288	0.981686	0.548412	0.484085	0.300062	0.297989	0.111362	0.109071	0.129707
NFATc1	Control			100ng/mL			500ng/mL			1μg/mL
	1.08372	0.97701	0.99648	0.6057	0.5535	0.29051	0.14194	0.12704	0.02562	0.0325	0.02267	0.03786
c-FOS	Control			100ng/mL			500ng/mL			1μg/mL
	1.01083	1.08041	0.907694	0.595979	0.879293	0.909618	0.474905	0.504642	0.342198	0.137056	0.219151	0.030077

## Sheet: Fig.5C
<TRAP staining>
	Control			Rb1			Rg1			7:3			5:5			GDNs
TRAP+ MNC Numbers	158	175	195	139	135	123	98	129	111	89	134	99	103	132	103	12	17	16

## Sheet: Fig.6C
Col1	Control				M1 TCP				M0 TNS50				M0 TNS70
1W	1	1	1		2.04202	1.93187	2.04202		3.31728	3.24901	3.05252		5.35171	4.43828	5.02805
2W	1.94531	1.86607	1.59107		2.77022	2.34567	2.56685		3.45815	3.605	2.88786		3.65533	3.63008	3.50642
3W	1.17284	1.18099	1.17284		1.24833	1.37554	1.32869		2.82843	3.11666	2.51403		2.63902	3.36359	2.63902
OPN	Control				M1 TCP				M0 TNS50				M0 TNS70
1W	1	1	1		2.09943	2.56685	2.12874		2.60268	2.49666	2.62079		3.86375	4.40762	3.68075
2W	0.795536	1.04972	0.829319		0.90125	0.817902	0.864537		1.79005	1.90528	2.09943		2.02792	1.84038	2.04202
3W	0.817902	1.05702	1.17284		0.823591	0.926588	0.972655		1.70527	2.44528	1.75321		1.84038	2.09943	2.07053
<In vivo analysis>
	Control				LPS				LPS+GDNs L				LPS+GDNs H
BV/TV	84.2448	83.3847	84.4804	80.8432	77.2173	78.3755	70.5315	78.5733	80.9513	81.0038	82.2762	80.7912	79.1762	81.1997	81.4476	79.5387
	Control				LPS				LPS+GDNs L				LPS+GDNs H
Bone mineral density	0.7133	0.75515	0.78972	0.72856	0.67946	0.68549	0.59381	0.69143	0.74191	0.72072	0.7571	0.75226	0.70191	0.73969	0.72868	0.68726
	Control				LPS				LPS+GDNs L				LPS+GDNs H
Bone cavity	1.00622	1.24147	1.12093	1.75252	1.8935	1.68438	2.00742	1.54174	1.34429	1.41091	1.40545	1.45017	1.47603	1.40916	1.39563	1.29515

## Sheet: Supplementary 3
<TRAP staining>
GDNs	Control			100 ng/mL			500 ng/mL			1 μg/mL
TRAP+ MNC Numbers	167	151	137	62	67	68	35	47	30	21	26	22
Rb1	100 ng/mL			500 ng/mL			1 μg/mL
TRAP+ MNC Numbers	130	142	145	104	125	110	115	110	101
Rg1	1 μg/mL			10 μg/mL			100 μg/mL
TRAP+ MNC Numbers	123	122	102	90	103	102	85	68	72
