# Supplementary figures and images for: Ginseng-derived exosome-like nanovesicles extracted by sucrose gradient ultracentrifugation to inhibit osteoclast differentiation
Source: Royal Society of Chemistry journal article supplement (doi:10.1039/d2nr07018a), 2023-01-01

**Supplementary Figure 1.**

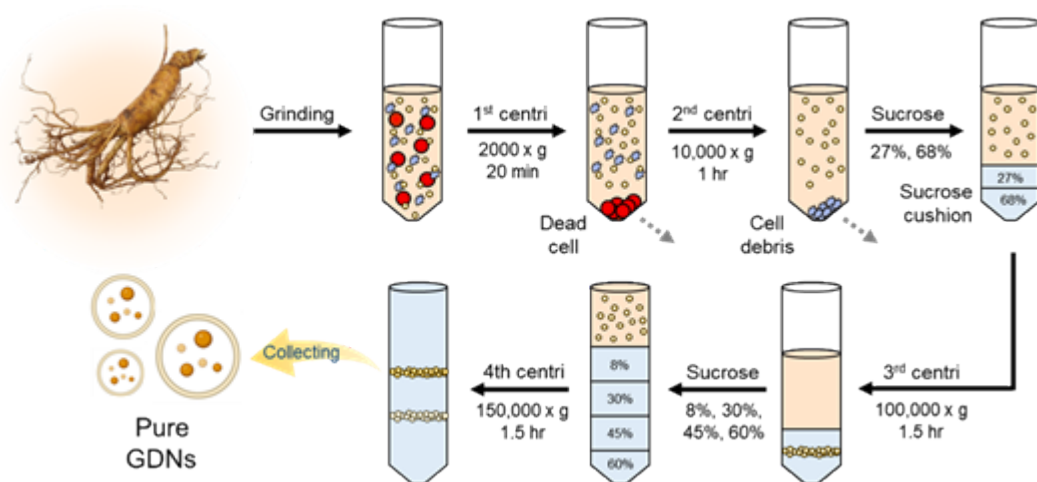

**Supplementary Figure 2.**

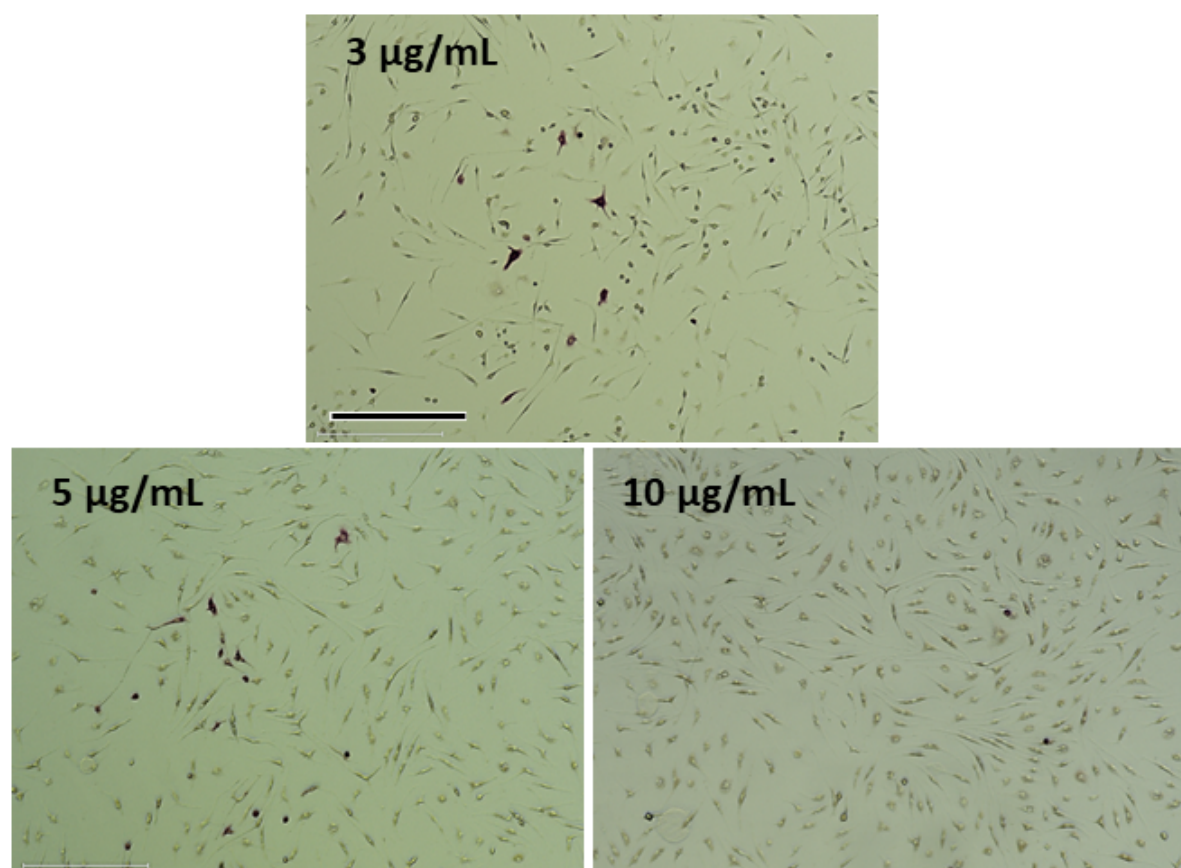

Supplementary Figure 3.

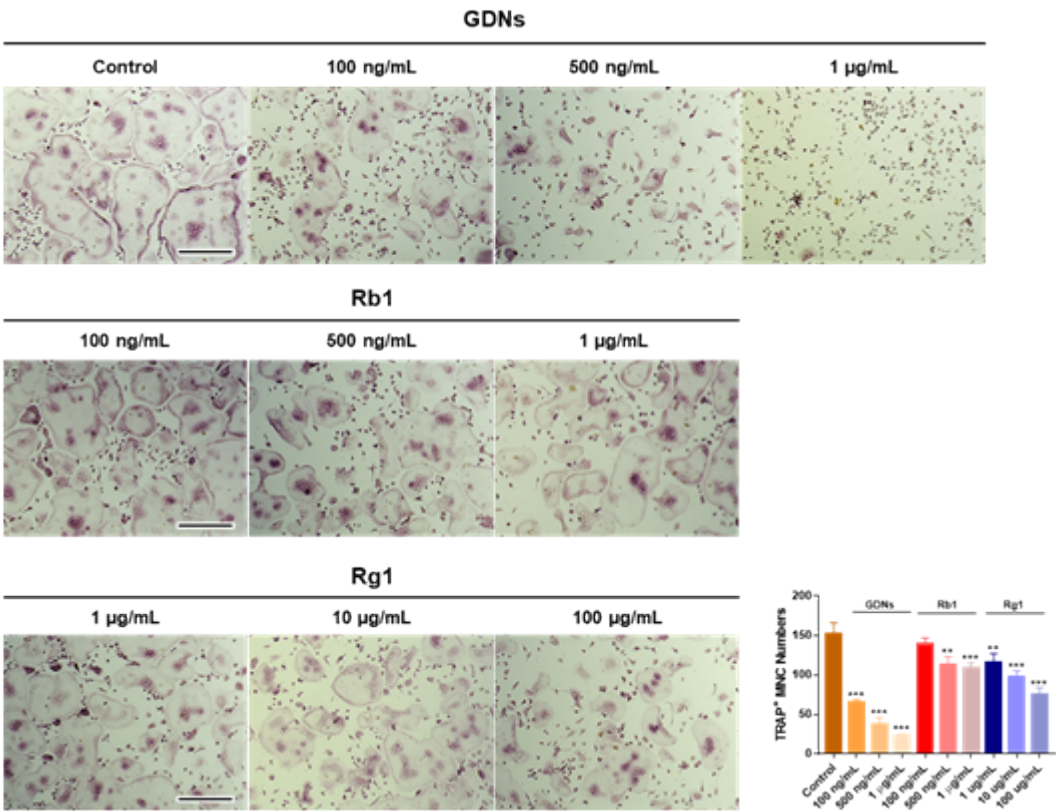

Supplement: d2nr07018a1.pdf [file d2nr07018a1.pdf]
